Figure 4

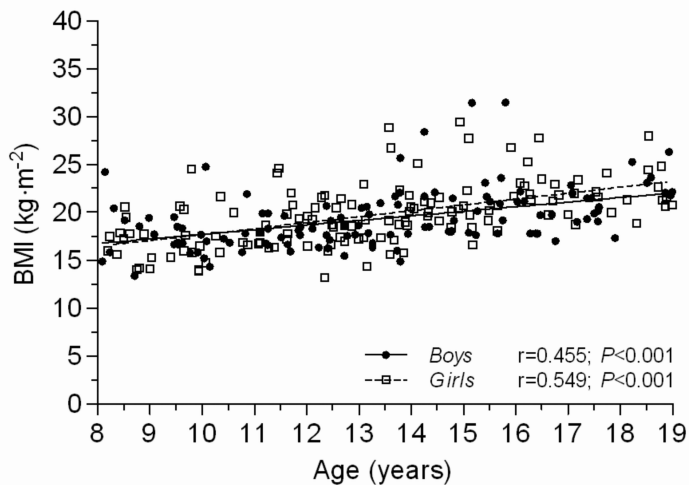

Source: https://academic.oup.com/ptj/article-pdf/93/11/1530/25194482/ptj1530.pdf
